# Supplementary material for: A zeolite-like aluminophosphate membrane with molecular-sieving property for water desalination
Source: Royal Society of Chemistry journal article supplement (doi:10.1039/c7sc04974a), 2018-01-01
Supplement: c7sc04974a1.pdf [file c7sc04974a1.pdf]

## Supporting Information

### **Zeolite-like aluminophosphate membrane with molecular-sieving property for water desalination**

Yanju Wang,<sup>a</sup> Xiaoqin Zou,<sup>a,\*</sup> Lei Sun,<sup>b</sup> Huazhen Rong<sup>a</sup> and Guangshan Zhu<sup>a</sup>

<sup>a</sup> Faculty of Chemistry, Northeast Normal University, Changchun 130024, P. R. China.

<sup>b</sup> State Key Laboratory of Molecular Reaction Dynamics, Dalian Institute of Chemical Physics, Chinese Academy of Sciences, Dalian 116023, P. R. China.

\*E-mail: zouxq100@nenu.edu.cn

#### 1. Experimental

##### *1.1. Materials*

Chemical reagents were of analytical grade and used as received without any further purification: aluminium isopropoxide ( $\text{Al}(\text{i-C}_3\text{H}_7\text{O})_3$ , Tianjin Guangfu Chemical Reagent Co., Ltd.), tetraethylammonium hydroxide (TEAOH, 35 wt% aqueous solution, Alfa Aesar), phosphoric acid ( $\text{H}_3\text{PO}_4$ , 85 wt%, Beijing Chemical Reagent Company), salts of NaCl (99.5%, Beijing Chemical Reagent Company), KCl (99.5%, Tianjin FuChen Chemical Reagent Factory),  $\text{MgCl}_2$  (98%, Tianjin DaMao Chemical Reagent Factory) and  $\text{CaCl}_2$  (96%, Beijing Chemical Reagent Company).  $\text{Na}^+$ ,  $\text{K}^+$ ,  $\text{Mg}^{2+}$  and  $\text{Ca}^{2+}$  (0.5 mol L<sup>-1</sup>, 0.5M) single and multi-component solutions (0.57M, ~3.5 wt%) were prepared by dissolving the corresponding salts in deionized water.

The substrate of porous stainless-steel-net (300 mesh) was purchased from State No. 540 Company, Xinxiang, China.<sup>18</sup> Prior to use, the net was cut into pieces of 20 mm in diameter and cleaned in a detergent solution (1.0 mL in 50 mL deionized water) under ultrasonic conditions for 30 minutes. The nets were further washed with deionized water in an ultrasonic bath and dried at 85 °C.

##### *1.2. Syntheses of $\text{AlPO}_4$ -18 seeds and membranes*

Nanosized  $\text{AlPO}_4$ -18 crystals were prepared in a synthesis solution with the molar ratio of  $1.0\text{Al}_2\text{O}_3:3.16\text{P}_2\text{O}_5:3.16(\text{TEA})_2\text{O}:186\text{H}_2\text{O}$  according to the literature.<sup>36</sup> The protocol was detailed as followed: first,  $\text{Al}(\text{i-C}_3\text{H}_7\text{O})_3$  was dissolved in an aqueous TEAOH solution. A clear solution was obtained after stirring for about 20 minutes at room temperature. Second,  $\text{H}_3\text{PO}_4$  was added into above solution under stirring in a dropwise manner, and this solution was kept under stirring for another 1 h. Third, the mixture solution was filtrated by a PTFE syringe with 450 nm pores in order to remove any suspended matter. The obtained clear precursor was transferred to the autoclave and heated in a microwave reactor (XT-9906, Xintuo Analytical Instruments Co., LTD, Shanghai, China) at 800 W and 25 minutes to reach 180 °C and 2.0 MPa, and then held for 5.0 minutes. The suspension was purified by repeated centrifugations (20000 rpm and 5 minutes for each run), and then washed to neutral. The seed solution ( $\sim 10 \text{ g L}^{-1}$  in water) was deposited dropwise on pre-cleaned nets, and net substrates were subjected to additional drying. Seeded substrates were placed vertically in a mother solution with the molar composition of  $1.0\text{Al}_2\text{O}_3:\text{P}_2\text{O}_5:(\text{TEA})_2\text{O}:160\text{H}_2\text{O}$ , which was prepared by mixing  $\text{Al}(\text{i-C}_3\text{H}_7\text{O})_3$ , TEAOH and  $\text{H}_3\text{PO}_4$  with deionized water under vigorously stirring for 6 h. Crystallization was conducted at 200 °C in a static oven for 24 h. The membranes were taken out after cooling down, washed with deionized water in an ultrasonic bath, and dried at 85 °C. The organic templates in  $\text{AlPO}_4$ -18 membranes were removed by calcination in air at 550 °C (heating ramp of  $1.0 \text{ }^\circ\text{C min}^{-1}$ ) for 6 h.

### *1.3. Characterizations*

The crystalline structures of  $\text{AlPO}_4$ -18 seeds and membranes were determined by X-ray diffractions on Rigaku SmartLab X-ray diffractometer with Cu-K $\alpha$  radiation ( $\lambda = 1.5418 \text{ \AA}$ ) running at a voltage of 40 kV and a current of 30 mA. The seeded and membrane layers were visualized on field emission scanning electron microscope equipped with energy-dispersive X-ray spectroscopy (FE-SEM, SU-8010, Hitachi).  $\text{N}_2$  physical sorption was carried out at 77 K on Autosorb-iQ2 adsorptometer (Quantachrome Instruments). Water adsorption isotherms were recorded at 298 K on

the same type of apparatus (Autosorb-iQ2 adsorptometer). Prior to both measurements, AlPO<sub>4</sub>-18 sample was degassed at 200 °C for 12 h under vacuum.

#### 1.4. Simulations

To determine water adsorption and diffusion behaviors in AlPO<sub>4</sub>-18 at 298 K, the grand canonical Monte Carlo (GCMC) and molecular dynamics (MD) were performed respectively using the RASAP code developed in previous reports.<sup>38-39</sup>

In the simulations, the structure (2×2×2 unit cell) was treated as a rigid framework. The number of unit cells for AlPO<sub>4</sub>-18 was chosen in order to meet the requirement that all of the perpendicular cell lengths are larger than twice the cutoff distance, which was set to 12 Å in our simulations. Guest water molecules were described by the TiP4P/Ew model,<sup>40</sup> a TiP4P model parameterized for Ewald sums. Lennard-Jones and Coulombic potentials were used to describe the interactions between host and guest. The like-pair parameters of atoms in AlPO<sub>4</sub>-18 were taken from the literature (Table S2), and the unlike-pair parameters were determined using Lorentz-Berthelot combining rules.<sup>41</sup> The atomic point charges of AlPO<sub>4</sub>-18 unit cell were calculated by using quantum mechanics (QM) method in DMol3 8.0<sup>42</sup> and the ones of water molecules were set as the description in the TiP4P/Ew model. Ewald method with precision of 10<sup>-6</sup> was used to compute the charge interactions between atoms.

In GCMC simulations, each point of the isotherms at 298 K was obtained after equilibration runs of 50000 cycles followed by production runs of 300000 cycles. The MD simulations were performed in the NVT ensemble using the Nose-Hoover thermostats. A set of classical trajectories by integrating the equations of motion for a group of molecules was created through the MD method. The MD simulations were run for 4 ns with 0.5 ns equilibrium. A time step of 0.5 fs was used to integrate the equations of motion. In the equilibrium MD simulation, the self-diffusion coefficient  $D_s$  was evaluated by taking the slope of the mean-squared displacement (MSD)

Equation (1)

$$D_s = \frac{1}{2dN} \lim_{t \rightarrow \infty} \frac{d}{dt} \left\langle \sum_{i=1}^N (r_i(t) - r_i(0))^2 \right\rangle$$

where  $N$  is the number of molecules,  $d$  is the spatial dimension of system,  $t$  is the simulation time and  $r_i$  is the center-of-mass of molecule  $i$ .

In order to investigate the transport properties of water molecules in  $\text{AlPO}_4\text{-18}$ , three water loadings (1, 8 and 396 water molecules per super cell marked respectively as m1, m8 and m396) were simulated through MD method. Here, m1 had one water molecule within the whole framework, m8 had eight water molecules within one large pore and the number of water molecules for m396 was chosen according to the GCMC simulation result under 2600 Pa.

In Dmol3 calculation process, exchange-correlation functions were calculated within a General Gradient Approximate (GGA) with the Perdew-Burke-Ernzerhof (PBE) functional.<sup>46</sup> The effective core potential (ECP) was adopted together with the double numerical (DNP) basis set. The Brillouin zone was sampled using a  $3 \times 3 \times 2$  Monkhorst-Pack k-point grid. The convergence criterion of the geometric optimization was set to be  $1.0 \times 10^{-5}$  Hartree for energy change,  $2.0 \times 10^{-3}$  Hartree/Å for the gradient,  $5.0 \times 10^{-3}$  Å for the displacement, and  $1.0 \times 10^{-6}$  eV for self-consistent field energy, respectively. Hirshfeld charge population analysis was adopted to obtain the charge distribution.<sup>47</sup>

### 1.5. Desalination tests

Prior to desalination, the membrane continuity was checked by single-gas permeations of  $\text{H}_2$  and  $\text{N}_2$  in a standard mode. Typically, single gas of  $\text{H}_2$  or  $\text{N}_2$  (each at  $50 \text{ ml min}^{-1}$ ) was fed into the membrane chamber, the permeance of corresponding permeate gas was measured by an online gas chromatography (SCION 456GC). The  $\text{H}_2/\text{N}_2$  selectivity was determined by the ratio of  $\text{H}_2$  and  $\text{N}_2$  pressures in the permeate over the corresponding ratio in the feed. The separation performances of  $\text{AlPO}_4\text{-18}$  membranes for seawater desalinations were assessed using a batch pervaporation system, the apparatus of which was described in our previous report.<sup>18</sup> The supported  $\text{AlPO}_4\text{-18}$  membrane was fixed in the membrane chamber and sealed with xylene resistant fluorocarbon O-rings, and connected to a vacuum line at the permeate side. The pressure on the feed side was kept at one atmosphere ( $\sim 101 \text{ kPa}$ ). Single- (0.5M NaCl, 0.5M KCl, 0.5M  $\text{MgCl}_2$ , 0.5M  $\text{CaCl}_2$ ) and multi-component (a mixture

containing 0.5M NaCl, 0.01M KCl, 0.05M MgCl<sub>2</sub>, 0.01M CaCl<sub>2</sub>) salt solutions were stored in a mixing tank and circulated using a small pump in order to minimize the concentration gradient. The experiments were performed at 22 °C (25 °C), 35 °C, 45 °C, 55 °C, 65 °C, the temperature of which was monitored by a thermocouple placed in the center of the membrane module. The permeated solution was collected in a liquid-nitrogen cooled trap after a preset time interval of ~7 h. The amount of permeated solution was calculated by the weight difference of the trap before and after each test. The concentrations of the feed and permeated solutions were analyzed by inductively coupled plasma atomic emission spectrometer (ICPAES, a Leeman-labs Prodigy High Dispersion ICP instrument). The separation characteristics were defined using the parameters of water flux ( $F$ , kg m<sup>-2</sup> h<sup>-1</sup>) and ion rejection ( $R$ , %) in the following:

Equation (2)

$$F = \frac{M}{S \times t}$$

Equation (3)

$$R = \frac{C_{i,feed} - C_{i,permeate}}{C_{i,feed}} \times 100\%$$

where  $M$  is the permeate mass (kg),  $S$  is the membrane area (m<sup>2</sup>),  $t$  is the permeation time (h),  $i$  is the ion type,  $C_{feed}$  and  $C_{permeate}$  are ion concentrations in the feed and permeated solutions (ppm), respectively. After each test, the membrane was easily regenerated by washing surface residues in water in an ultrasonic bath for 5.0 minutes.

## 2. Supporting figures and tables

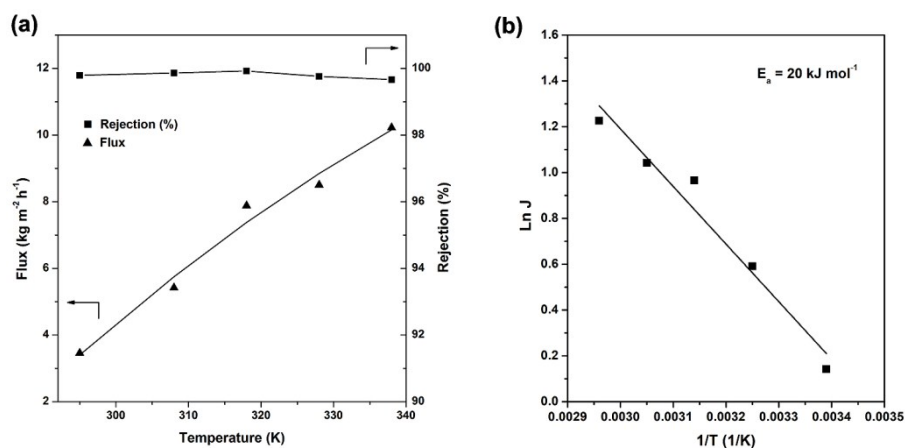

**Fig. S1** (a) Water flux and Na<sup>+</sup> rejection degree in function of temperature (0.5 M NaCl, a pressure drop of ~1.0 atm) on the AlPO<sub>4</sub>-18 membrane, and (b) calculated activation energy for water permeation based on the data in (a).

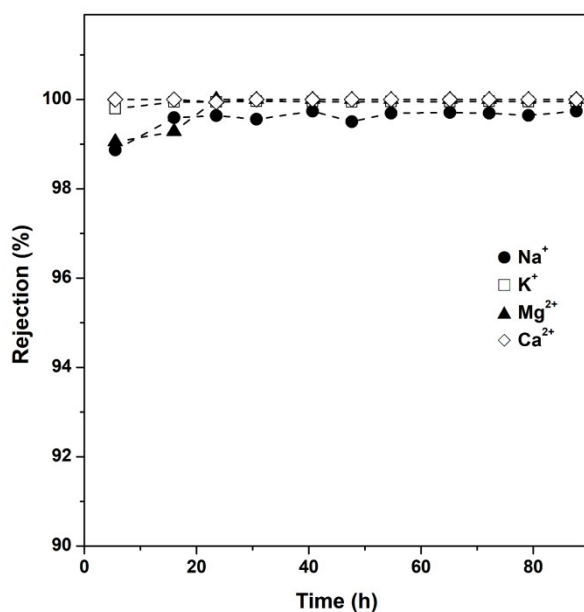

**Fig. S2** The variations of rejection degrees for Na<sup>+</sup>, K<sup>+</sup>, Mg<sup>2+</sup>, and Ca<sup>2+</sup> cations (a simulated seawater solution containing 3.5% salts) in function of test time on the AlPO<sub>4</sub>-18 membrane (test conditions: 298 K, feed pressure of 1.0 atm).

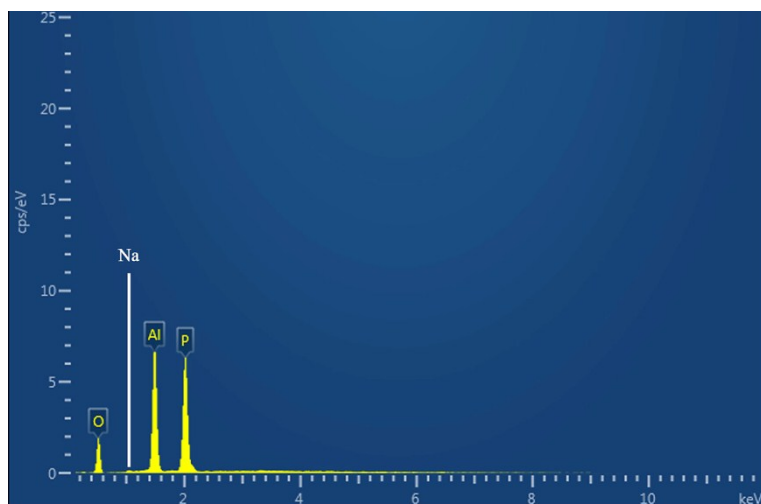

**Fig. S3** Elemental mapping of the AlPO<sub>4</sub>-18 membrane after desalination test measured by EDS.

**Table S1** Textural data of chemical composition and pore structure for AlPO<sub>4</sub>-18 collected from the membrane.

| Sample                | Al/P Ratio <sup>a</sup> | Surface Area<br>(m <sup>2</sup> g <sup>-1</sup> ) <sup>b</sup> | V <sub>total</sub><br>(cm <sup>3</sup> g <sup>-1</sup> ) <sup>c</sup> | V <sub>micro</sub><br>(cm <sup>3</sup> g <sup>-1</sup> ) <sup>d</sup> | Pore Width<br>(Å) <sup>e</sup> |
|-----------------------|-------------------------|----------------------------------------------------------------|-----------------------------------------------------------------------|-----------------------------------------------------------------------|--------------------------------|
| AlPO <sub>4</sub> -18 | 1.02                    | 754                                                            | 0.647                                                                 | 0.283                                                                 | 8.23                           |

<sup>a</sup> Aluminum-to-phosphorus ratio measured by ICP; <sup>b</sup> Brunauer-Emmett-Teller (BET) surface area estimated at P/P<sub>0</sub> = 0.99; <sup>c</sup> total pore volume calculated at P/P<sub>0</sub> = 0.99; <sup>d</sup> micropore volume determined by *t*-plot method; <sup>e</sup> pore width in diameter determined by NL-DFT method.

**Table S2** Interaction potential parameters used for AlPO<sub>4</sub>-18.

|                 | σ (Å) | ε (K)   |
|-----------------|-------|---------|
| Al <sup>a</sup> | 4.008 | 254.151 |
| P <sup>a</sup>  | 3.695 | 153.497 |
| O <sup>b</sup>  | 3.000 | 93.53   |

<sup>a</sup> C. A. Koh, T. Montanari, R. I. Nooney, S. F. Tahir and R. E. Westacott, *Langmuir*, 1999, **15**, 6043-6049; <sup>b</sup> M. Trzpit, M. Soulard, J. Patarin, N. Desbiens, F. Cailliez, A. Boutin, I. Demachy and A. H. Fuchs, *Langmuir*, 2007, **23**, 10131-10139.
